# Supplementary material
Source: PubMed Central journal article supplement (PMC7802008)
Supplement: jamapediatr-e205218-s001.pdf [file jamapediatr-e205218-s001.pdf]

**Project EARLY**  
**Early Identification And Service Linkage For Urban Children With Autism: A Randomized  
Controlled Trial**

**ClinicalTrials.gov number:** NCT02359084

**Funding Mechanism:** National Institute of Health/ National Institute of Mental Health

**Award#:** 1R01MH104355

**Principal Investigator:** Emily Feinberg

**E-mail:** emfeinbe@bu.edu

**CONFIDENTIAL**

**This document is confidential and the property of Boston University. No part of it may be transmitted, reproduced, published, or used by other persons without prior written authorization from the study sponsor.**

Table of Contents

**1** **List of Abbreviations** ..... 4

**2** **Protocol Summary** ..... 4

**3** **Background/Rationale & Purpose** ..... 5

**3.1** **Background Information**..... 5

**3.1.1** **Description of the health issue and research question**..... 5

**3.2** **Research Question**..... 6

**3.3** **Brief description of the study intervention** ..... 6

**3.4** **Pertinent prior experience with the intervention** ..... 7

**3.5** **Rationale and Purpose** ..... 8

**4** **Objectives** ..... 8

**4.1** **Study Objectives** ..... 8

**4.2** **Study Outcome Measures** ..... 8

**4.2.1** **Primary Outcome Measures**..... 8

**4.2.2** **Secondary Outcome Measures** ..... 9

**4.2.3** **Other Outcome Measures**: ..... 9

**5** **Study Design**..... 10

**5.1** **Type/Design of Trial**..... 10

**5.2** **Randomization process**..... 10

**6** **Potential Risks and Benefits**..... 11

**6.1** **Risks** ..... 11

**6.1.1** **Protections against risks**..... 11

**6.2** **Potential Benefits** ..... 12

**6.3** **Analysis of Risks in Relation to Benefits** ..... 12

**7** **Study Subject Selection** ..... 13

**7.1** **Subject Inclusion Criteria** ..... 13

**7.2** **Subject Exclusion Criteria**..... 13

**8** **Study Intervention** ..... 13

**8.1** **Overview**..... 13

**8.2** **Intervention** ..... 13

**8.3** **Control Intervention**..... 14

**9** **Study Procedures** ..... 14

**9.1** **Recruitment**..... 14

**9.2** **Consent**..... 15

**9.3** **Facilitated diagnostic evaluation**..... 15

**9.4** **Referral to and engagement in treatment**..... 16

|                    |                                                                                 |           |
|--------------------|---------------------------------------------------------------------------------|-----------|
| <b><u>9.5</u></b>  | <b><u>Fidelity</u></b> .....                                                    | <b>16</b> |
| <b><u>9.6</u></b>  | <b><u>Follow-up assessment</u></b> .....                                        | <b>16</b> |
| <b><u>10</u></b>   | <b><u>Assessment of Safety and Data Safety Monitoring Plan (DSMP)</u></b> ..... | <b>19</b> |
| <b><u>10.1</u></b> | <b><u>Definitions</u></b> .....                                                 | <b>19</b> |
| <b><u>10.2</u></b> | <b><u>Safety Review</u></b> .....                                               | <b>20</b> |
| <b><u>10.3</u></b> | <b><u>Stopping Rules</u></b> .....                                              | <b>21</b> |
| <b><u>11</u></b>   | <b><u>Data Handling and Record Keeping</u></b> .....                            | <b>21</b> |
| <b><u>11.1</u></b> | <b><u>Confidentiality</u></b> .....                                             | <b>21</b> |
| <b><u>11.2</u></b> | <b><u>Source Documents</u></b> .....                                            | <b>22</b> |
| <b><u>11.3</u></b> | <b><u>Study Records Retention</u></b> .....                                     | <b>22</b> |
| <b><u>12</u></b>   | <b><u>Statistical Plan</u></b> .....                                            | <b>23</b> |
| <b><u>12.1</u></b> | <b><u>Study Hypotheses</u></b> .....                                            | <b>23</b> |
| <u>12.1.1</u>      | <u>Primary Hypothesis</u> .....                                                 | <u>23</u> |
| <u>12.1.2</u>      | <u>Secondary Hypotheses</u> .....                                               | <u>23</u> |
| <b><u>12.2</u></b> | <b><u>Sample Size Determination</u></b> .....                                   | <b>23</b> |
| <b><u>12.3</u></b> | <b><u>Statistical Methods</u></b> .....                                         | <b>24</b> |
| <u>12.3.1</u>      | <u>Logistics</u> .....                                                          | <u>24</u> |
| <u>12.3.2</u>      | <u>Intervention main effects</u> .....                                          | <u>24</u> |
| <b><u>12.4</u></b> | <b><u>Mediator/ Moderator Analyses</u></b> .....                                | <b>24</b> |
| <b><u>12.5</u></b> | <b><u>Sub-group Analyses</u></b> .....                                          | <b>25</b> |
| <b><u>13</u></b>   | <b><u>Ethics/Protection of Human Subjects</u></b> .....                         | <b>25</b> |
|                    | <b><u>References</u></b> .....                                                  | <b>27</b> |

## 1 List of Abbreviations

| <b>Abbreviation</b> | <b>Abbreviation definition</b>                                   |
|---------------------|------------------------------------------------------------------|
| ASD                 | Autism Spectrum Disorder                                         |
| BMC                 | Boston Medical Center                                            |
| BUMC                | Boston University Medical Campus                                 |
| CCM                 | Conventional Care Management                                     |
| CHOP                | Children’s Hospital of Philadelphia                              |
| CT                  | Connecticut                                                      |
| DBP                 | Developmental and Behavioral Pediatrics                          |
| DSMB                | Data Safety Monitoring Board                                     |
| FN                  | Family Navigation                                                |
| IRB                 | Institutional Review Board                                       |
| ITT                 | Intent-to-treat                                                  |
| MA                  | Massachusetts                                                    |
| MCHAT-R/F           | Modified Checklist for Autism in Toddlers-revised with follow up |
| PA                  | Pennsylvania                                                     |
| PI                  | Principal Investigator                                           |
| PCP                 | Primary care provider                                            |
| PN                  | Patient Navigation                                               |
| RA                  | Research Assistant                                               |
| RCT                 | Randomized Controlled Trial                                      |

## 2 Protocol Summary

|                      |                                                                                                                                                                                                                                                                                                                                                                                                                                                                                                                                                                                                                                                                                                                                                                                                                                                              |
|----------------------|--------------------------------------------------------------------------------------------------------------------------------------------------------------------------------------------------------------------------------------------------------------------------------------------------------------------------------------------------------------------------------------------------------------------------------------------------------------------------------------------------------------------------------------------------------------------------------------------------------------------------------------------------------------------------------------------------------------------------------------------------------------------------------------------------------------------------------------------------------------|
| <b>Title:</b>        | Early Identification And Service Linkage For Urban Children With Autism                                                                                                                                                                                                                                                                                                                                                                                                                                                                                                                                                                                                                                                                                                                                                                                      |
| <b>Population:</b>   | 250 children ages 15-27 months identified with a positive MCHAT-R/F screen in primary care (or for whom there are clinical concerns for autism) who are referred for an autism evaluation                                                                                                                                                                                                                                                                                                                                                                                                                                                                                                                                                                                                                                                                    |
| <b>Intervention:</b> | <p>Families will be randomized to FN or CCM. FN families will be assigned a navigator who conducts community-based outreach to families to address structural barriers to care and support engagement in recommended services. The goal of FN during the diagnostic evaluation period is to ensure timely completion of the evaluation. The focus of these interactions is to understand the structure and purpose of the evaluation, gather and complete required materials, and address logistic barriers related to the diagnostic visit.</p> <p>CCM families will be assigned to a care manager. Consistent with a high-quality medical home, the care manager is responsible to ensure that the referral for the diagnostic evaluation has been made. She will also be available for family-initiated support. The care manager will be responsible</p> |

---

for ensuring that referrals are made and continue to provide family-initiated, clinic-based support to families.

Families will receive FN or CCM following a positive initial screen and for 100 days after diagnostic ascertainment.

---

**Objectives:**

Goal 1. To assess the effect of Family Navigation (FN) as compared to conventional care management (CCM) to shorten the time to diagnosis among children suspected to have ASD; shorten the time to deployment of ASD services among those diagnosed; and improve engagement with ASD services

Goal 2. To document the proportion of the study sample that is diagnosed with ASD or another developmental condition

Goal 3. To assess the role of caregiver stress, burden, and behavioral activation as potential intervention mediators; and practice site and race/ethnicity as potential intervention moderators.

---

**Design/Methodology:**

Our overall design is a Type 1 Effectiveness-Implementation Hybrid design, whereby we test a systemic FN protocol within a randomized design, while concurrently gathering information on FN's delivery to inform its potential for ultimate dissemination and implementation. **This protocol covers the randomized controlled trial.** Randomization will happen after referral to an autism evaluation. FNs will meet in-person with families at three timepoints: before the evaluation to provide psychoeducation, after the evaluation to discuss diagnosis and recommended services, and 100 days after receipt of diagnosis to review families' progress and next steps. Care managers will contact the families by phone after referral for an evaluation. They will be available to answer questions related to the evaluation, appointments, etc. All subsequent contacts with the care managers beyond the introductory call must be initiated by the parent. Care managers will not be available to meet in-person with patients

---

**Total Study Duration:**

February 12, 2015- July 27, 2020

---

**Subject Participation Duration:**

12 months

---

### 3 Background/Rationale & Purpose

#### 3.1 Background Information

##### 3.1.1 Description of the health issue and research question.

Tools to identify and diagnose very young children with ASD have been validated<sup>1-6</sup>, and recommendations for universal ASD screening at the 18 or 24-month health supervision visit have been adopted by all major pediatric professional societies<sup>7,8</sup>. Although evidence that interventions for very young children can impact the core deficits of ASD continues to grow,<sup>9-12</sup> systems changes that support universal screening, comprehensive evaluation, and timely access to services have not kept pace with advances in diagnosis and treatment.<sup>13-15</sup> Furthermore, despite a secular trend toward earlier identification of ASD,<sup>16-20</sup> minority and low-income children continue to be diagnosed later than white and more financially advantaged children.<sup>16,21-25</sup> Once diagnosed, minority children receive fewer and lower quality services<sup>24</sup> and they wait longer to receive these services.<sup>23,26-28</sup> Feasible, systemic interventions with broad scale-up potential are necessary to decrease racial and ethnic disparities in identifying children with ASD and in providing them timely, high quality services.

Our dual goal to reduce existing disparities and improve early ASD identification and linkage to services underlies the rationale for the setting of this study— three urban primary care networks (in Philadelphia- CHOP; in New Haven-Yale University; in Boston- Boston Medical Center) affiliated with academic Developmental and Behavioral Pediatrics (DBP) autism specialty clinics. These systems represent the types of integrated, real world settings that care for poor and minority families in cities across the US and support the potential for broad intervention dissemination and implementation.

### **3.2 Research Question.**

Does Family Navigation (FN), an individually-tailored, culturally-informed care management strategy, increase the likelihood of achieving diagnostic ascertainment among low-income, racial/ethnic minority children who screen positive for autism spectrum disorder (ASD)?

### **3.3 Brief description of the study intervention**

We propose a parallel group, randomized trial of 15-27-month-old children attending health supervision visits at one of our three study sites. One group will receive a systemic FN protocol, which includes support for diagnostic evaluation; referral to treatment; and engagement in treatment. Control group subjects will receive conventional care management (CCM), which is designed to be consistent with the type of care provided within a traditional – but high quality – patient centered medical home.

Patient navigation (PN) is a theory-based and empirically-supported care management strategy.<sup>29,30</sup> It differs from other care management strategies in that it focuses on overcoming patient-specific barriers to a defined set of services over a defined, time-limited period. PN is well established in cancer care as a means to reduce disparities in outcomes.<sup>30, 31,32</sup> Emerging evidence of its efficacy among cancer patients demonstrates that it shortens the critical interval between a positive screening test (for example, a mammogram for breast cancer) and definitive diagnosis,<sup>33-35</sup> decreases anxiety,<sup>36</sup> and increases satisfaction with services.<sup>36</sup> The goal of navigation is to integrate a disjointed health care system on behalf of an individual patient. In this study, we will build upon the established principles of Navigation but expand the navigator role in novel ways. Navigation services will be provided to the family unit by bilingual paraprofessionals and referred to as Family Navigation (FN). It will be extended to integrate a fragmented network of ASD services that requires coordination among community-based and educational services, as well as those provided by the conventional health care team.

Additionally, FN will be augmented with theory-based behavior change strategies – motivational interviewing and collaborative decision making – that support patient engagement and self-management skills. A typical FN activity may be to assist a parent with marginal literacy to complete a clinic’s patient questionnaires, help a family know what to expect during a stressful ASD diagnostic evaluation, or coordinate childcare around a child’s early intervention schedule. In this study, the systemic FN protocol will begin at the time of a child’s referral for an autism evaluation, and end 100 days after diagnostic resolution – at which time, a child with ASD would be expected to be engaged in intensive early intervention services (based on the guidance from Autism Speaks).<sup>37</sup>

CCM will be delivered by care managers who will contact the families by phone after referral for an evaluation. They will be available to answer questions related to the evaluation, appointments, etc. All subsequent contacts with the care managers beyond the introductory call must be initiated by the parent. Care managers will not be available to meet in-person with patients

### 3.4 Pertinent prior experience with the intervention.

To date, we have conducted two small-scale randomized trials of FN – each focusing on its feasibility during discrete periods of time within the broader trajectory between initial ASD screening and ultimate service provision:

**Diagnostic Period.** Our first trial (Feinberg R03HS22155) concerns the period between an initial suspicious ASD screen and diagnostic resolution. Data from this ongoing pilot RCT (N=27) demonstrate the feasibility of trialing FN more broadly across the 3 sites proposed in the current application. Specifically, training navigators to fidelity in the FN model requires only a 4-day training; supervising navigators requires only a weekly one-hour supervision session; and investigators know of no adverse events that could jeopardize the safety or welfare of either the lay navigators or the families they serve. Furthermore, although we interpret group-to-group comparisons in pilot studies with extreme caution,<sup>38,39</sup> our pilot data provide suggestive evidence of FN’s potential to improve timely diagnosis. Thus far, 90% of children who received FN in this pilot study completed a diagnostic evaluation for ASD, compared to 24% who received usual care.

**Engagement with Treatment.** Our second trial (Augustyn R40MC19928) concerns the period beginning with definitive ASD diagnosis and ending 6 months later, when the child should be fully engaged with services. This trial provided rich process data that constituted the basis of important intervention refinements for the present trial. In this trial, 76 of 78 parents randomly allocated to the FN arm actively engaged with their navigators to access treatment and entitlement services. Navigators spent an average of 15 hours with each family over the course of the 6-month intervention. During this time, families received an average of 6 in-person visits, 17 phone contacts and 4 email contacts. Accessing services accounted for 58% of documented navigator person-time, followed by accessing public benefit programs. We assessed for potential contamination in this trial and found that all participants received the intervention as assigned.

This study will be conducted in compliance with the protocol, applicable regulatory requirements, and BMC/BU Medical Campus Human Research Protection policies and procedures.

### 3.5 Rationale and Purpose

This study is a replicable, comprehensive service intervention within the type of health system where most urban children receive routine health care. This multisite collaboration is an example of the type of practice-based research network that can serve as a laboratory for testing replicable systems innovations with strong potential for widespread adoption and use.<sup>40</sup> Given the near universal participation of US children in primary care, a primary care-based intervention has broader reach than other possible settings and maximizes the number of children who might benefit from proposed systems changes.<sup>41</sup>

## 4 Objectives

### 4.1 Study Objectives

Goal 1. To assess the effect of Family Navigation (FN) as compared to conventional care management (CCM) to shorten the time to diagnosis among children suspected to have ASD; shorten the time to deployment of ASD services among those diagnosed; and improve engagement with ASD services

Goal 2. To document the proportion of the study sample that is diagnosed with ASD or another developmental condition

Goal 3. To assess the role of caregiver stress, burden, and behavioral activation as potential intervention mediators; and practice site and race/ethnicity as potential intervention moderators.

### 4.2 Study Outcome Measures

For all children enrolled in the trial (n=250), data on screening and diagnostic outcomes (from the child's problem list) will be abstracted electronically from the child's medical record. We will more obtain more detailed demographic and outcome data for children who fail the initial M-CHAT-R/F screen and whose families provide written, informed consent. Confirmatory screening results, referrals to care, and service use will be obtained from care manager and navigator logs and from the child's medical, early intervention, and ASD service provider records. We will also collect data on satisfaction with services and, among the FN group, relationship with the assigned navigator during final research assessment. There are 3 follow up data collection points: after diagnostic evaluation, 100 days after receipt of diagnosis, and 1 year after study enrollment.

#### 4.2.1 Primary Outcome Measures

1. Diagnostic interval: Number of days defined as beginning the day of the positive confirmatory screen and ending the day when the family receives a determination (yes/no) of ASD diagnosis
2. Time to receipt of ASD services/recommended services: Number of days from date of diagnosis to receipt of recommended services



#### 4.2.2 Secondary Outcome Measures

1. Determination of ASD diagnosis (based on DSM V criteria made by a Board Certified DBP Pediatrician. Assessments are based on site protocols; all use standardized, validated measures appropriate for very young children.)<sup>42-45</sup> [Time Frame: 1 year]. Determination of ASD diagnosis will be based on DSM V criteria made by a Board Certified DBP Pediatrician. Assessments are based on site protocols; all use standardized, validated measures appropriate for very young children.
2. Satisfaction with Family Navigator (Patient Satisfaction with Interpersonal Relationship with Navigator (PSN-I)) [Time Frame: 100 days after developmental assessment completion]. The Patient Satisfaction with Interpersonal Relationship with Navigator (PSN-I) is a newly validated 9 item scale to assess satisfaction with the interpersonal relationship with the navigator.<sup>46-48</sup>

#### 4.2.3 Other Outcome Measures:

1. Perceived Stress Scale - Self Report (PSS) [Time Frame: 1-4 weeks after developmental assessment completion, 100 days after developmental assessment completion, 1 year after failed confirmatory screen]. The Perceived Stress Scale is a measure of the degree to which situations in one's life are appraised as stressful. The questions in the PSS ask about feelings and thoughts during the last month. In each case, respondents are asked how often they felt a certain way.; lower scores are more favorable.<sup>49</sup>
2. Parenting Stress Index - Short Form<sup>50-52</sup> (PSI-SF) [Time Frame: 1-4 weeks after developmental assessment completion, 100 days after developmental assessment completion, 1 year after failed confirmatory screen]. This measure is a brief version of the Parenting Stress Index, a widely used and well-researched measure of parenting stress. The PSI-SF has 36 items from the original 120-item PSI. Items are identical to those in the original version. It was developed in response to clinicians' and researchers' need for a shorter measure of parenting stress and was based on factor analysis of the original PSI, which suggested the presence of three factors. It yields scores on the following subscales: 1) Parental Distress, 2) Parent-Child Dysfunctional Interaction, and 3) Difficult Child. Similar to the full PSI, it also has a validity scale.
3. Brief COPE<sup>53</sup> [Time Frame: 1-4 weeks after developmental assessment completion, 100 days after developmental assessment completion, 1 year after failed confirmatory screen]. The Brief COPE is designed to measure parents' coping strategies, including problem-focused coping, avoidant coping, and social coping
4. Pearlin Mastery Scale [Time Frame: 1-4 weeks after developmental assessment completion, 100 days after developmental assessment completion, 1 year after failed confirmatory screen]. The Pearlin Mastery Scale<sup>54</sup> is designed to measure self-concept and references the extent to which individuals perceive themselves in control of forces that significantly impact their lives. Total score can range from 7 to 28 points; higher scores are more favorable
5. VR12 Health Survey [Time Frame: 1-4 weeks after developmental assessment completion, 100 days after developmental assessment completion, 1 year after failed confirmatory screen]. The VR-12 includes 12 original question items from the VR-36. The questions in this survey correspond to seven different health domains: general health perceptions, physical functioning, role limitations due to physical and emotional problems, bodily pain, energy/fatigue levels, social functioning and mental health.<sup>55</sup>

6. Medical Outcomes Study-Social Support Survey (MOS-SSS) [Time Frame: 1-4 weeks after developmental assessment completion, 100 days after developmental assessment completion, 1 year after failed confirmatory screen]. This is a brief, multidimensional, self-administered, social support survey that was developed for patients in the Medical Outcomes Study (MOS), a two-year study of patients with chronic conditions. This survey was designed to be comprehensive in terms of recent thinking about the various dimensions of social support.<sup>56</sup>
7. Family Impact Questionnaire<sup>57</sup> (FIQ) [Time Frame: 1-4 weeks after developmental assessment completion, 100 days after developmental assessment completion, 1 year after failed confirmatory screen]. The FIQ measures parent's perceptions of their child's impact on family functioning.
8. Autism Parenting Stress Index (APSI) [Time Frame: 1-4 weeks after developmental assessment completion, 100 days after developmental assessment completion, 1 year after failed confirmatory screen]. Screening and triage measure for evaluating the parenting system and identifying issues that may lead to problems in the child's or parent's behavior. Focuses on three major domains of stress: child characteristics, parent characteristics and situational/demographic life stress.<sup>58</sup>
9. Adaptive Behavior Assessment System<sup>59</sup> (ABAS) [Time Frame: 1 year after failed confirmatory screen]. The ABAS measures functional and adaptive skills overall and on sub-scales including communication, self-direction, and social skills.
10. Brief Illness Perception Questionnaire<sup>60</sup> [Time Frame: 1 year after failed confirmatory screen]. This 9 item scale assesses emotional and cognitive perceptions of illness.
11. Hospital Care Questionnaire<sup>61</sup> [Time Frame: 100 days after developmental assessment completion, 1 year after failed confirmatory screen]. This questionnaire assesses satisfaction with hospital/medical staff and processes during care experiences.
12. Engagement in treatment [Time Frame: 1 year]. Number of hours of ASD/general developmental services will be assessed using Part C early intervention service data.
13. Mullen Scales of Early Learning (MSEL)<sup>62</sup> [Time Frame: 1 year after failed confirmatory screen]. This tool assesses developmental status in the areas of Visual Reception, Fine Motor, Receptive Language, and Expressive Language scales.
14. Vineland Adaptive Behavior Scales-3<sup>63</sup> [Time Frame: 1 year after failed confirmatory screen]. Parent/caregiver report child functioning in the areas of social interactions, communication, and daily living skills.
15. Autism Diagnostic Observation Schedule-2<sup>44</sup> (ADOS-2) [Time Frame: at time of evaluation and 1 year after failed confirmatory screen]. The ADOS assesses communication and repeated and restricted behavior to diagnose children with autism spectrum disorder.

## 5 Study Design

### 5.1 Type/Design of Trial.

We propose a parallel group, randomized trial of an estimated 250 families of 15-27-month-old children attending health supervision visits at one of our primary care study sites. One group will receive a systemic FN protocol, which comprises five integrated components specifically targeting universal screening; implementation of a decision rule for referral for ASD evaluation; expedited diagnostic evaluation; referral to treatment; and support for engagement in treatment.

Control group subjects will receive conventional care management (CCM), which is designed to be consistent with the type of care provided within a traditional – but high quality – patient centered medical home.<sup>64</sup>

## 5.2 Randomization process.

After completing the baseline assessment, participants (parent-child dyads) will be randomized 1:1 to FN or Conventional Care Management (CCM) using randomly permuted blocks of 2 and 4. Participants were stratified by primary care site and receipt of pre-screening educational materials. Randomization lists were generated for each site by a secure web-based data management system, StudyTRAX. Investigators and staff responsible for data collection were masked to study allocation.

Data collection for assessment of primary outcomes. Data will be collected from participant electronic health records, in-person face-to-face interviews and assessments, and records of developmental services.

## 6 Potential Risks and Benefits

### 6.1 Risks

1. The primary potential risk to subject is psychological because the research covers the subject of autism, a disabling and chronic condition that has long term impact on a child's development, it may be emotionally distressing to individuals in the study.
2. Although we will strive to maximize the cultural sensitivity in delivery of the proposed intervention, it is possible that certain individuals' explanatory models of their child's condition will be incompatible with our proposed intervention. This has the potential to upset study participants.
3. Although we will make every effort to store data in a secure and confidential manner, breaches of confidentiality may occur accidentally.
4. On rare occasions, information may be obtained that may require mandatory reporting, (for example, if we observe physical abuse during a research assessment). Although we have developed protocols to address such scenarios (sites will follow their mandatory reporting procedures), they will invariably be upsetting.
5. Possible but unlikely occurrences include psychological distress. It is unlikely that a family navigator will precipitate psychological distress as this type of activity is preventative and supportive in nature and does not explicitly address mental health conditions or stress. Family Navigation allows for clients to discuss their family practical life problems (transportation, insurance options, making appointments and handling paperwork) and leaves it up to the client to pick the barriers they want to address, with their family navigator. However, in the event that a significant psychological distress occurs, the Principal Investigator will be available via pager; and weekly supervision meetings will also be held to support staff through any events.

#### 6.1.1 Protections against risks

Dr. Feinberg has extensive experience training bilingual, bicultural research assistants to work with community-based projects. The research team will reflect the racial, ethnic, and cultural diversity of families seen at the BMC DBP clinics which will help secure culturally appropriate care.

Many measures will be taken to ensure confidentiality (see section 11.1). Since we have measures in place to protect confidentiality, if such breach is determined to have happened, we will consider this event to be an Unanticipated Problem. We will:

1. Contact all subjects whom the breach affected immediately, explain to them exactly what happened, and to our best approximation who had access to the data
2. Contact the BUMC IRB as soon as possible and within two business days of learning of the event
3. Review events and develop a corrective plan to minimize the likelihood that such event reoccurs

We perceive that the most serious potential risk to study participants is to observe physical abuse during a research assessment or meeting with a FN and not have an adequate way to deal with this. We will implement the following procedures to train staff how to address these risks:

1. FN and research staff will be trained in mandated reporting requirements and protocols to follow in the event that sometime is witnessed in the home or during an interaction with the family that is concerning
2. FN and research staff will be trained in responding to psychological distress
3. Throughout the study, FNs will meet regularly and review cases to discuss concerns
4. Research staff who conducts outcome assessments (they will not be navigators or care managers in order to maintain blinding) will meet with the project manager regularly to discuss concerns
5. FN and research staff will have the site PIs pager and, per protocol, will page her to discuss any concerning events at the time of the witnessed event

## 6.2 Potential Benefits

The potential long-term benefits of this study plan outweigh its risks. All children who demonstrate risk for ASD based on their failed MCHAT-R/F<sup>65</sup> screen will receive services that exceed those currently provided. The systematic completion of the M-CHAT-R/F and guarantee of an expedited ASD evaluation for those who fail the M-CHAT-R/F, which is available to all participants, regardless of treatment arm, is an enhancement to usual care at participating sites. Individuals not directly involved in this work stand the opportunity to benefit from the knowledge we gain from the study.

From a practice-based perspective, the project deliverables will assist interested practices and health insurers to implement the family navigator model outside of a rigorous research environment. At present, low income and minority children are not diagnosed with ASD as early as their white and more advantaged peers and, thus, do not receive recommended services during the period when they are most likely to improve outcomes. We hope that the proposed services system intervention will demonstrate efficacy as a feasible and acceptable strategy to promote timely identification of ASD, improve linkage and engagement to ASD treatment and services. Our plan to test Family Navigation in the types of primary care settings in which low-income, ethnically diverse children receive routine health care services will provide valuable information to primary care practices and integrated health networks about the potential benefits and barriers to implementing this type of intervention for children with ASD.

### 6.3 Analysis of Risks in Relation to Benefits

We believe that our study represents an innovative approach to addressing disparities in time to diagnosis among young children with ASD and far outweighs the risks. In fact, it establishes a structure to support families to be prepared and activated advocates for their children. The parent intervention, patient navigation, which we have broadened to encompass the family, has demonstrated effectiveness in a variety of settings in decreasing delays in diagnosis and improving a patient's experience. The study will allow us to test family navigation among children at risk for delays in ASD diagnosis. The intervention model, which could easily be expanded to children with a range of developmental concerns, has the potential for replication and widespread dissemination.

## 7 Study Subject Selection

### 7.1 Subject Inclusion Criteria

In order to be eligible to participate in this study, an individual must meet all of the following criteria:

- Child age 15 to 27 months who receive care at one of the study's primary care recruitment sites.
- Autism risk based on standard scoring protocol of M-CHAT R/F
- PCP clinical concern

### 7.2 Subject Exclusion Criteria

An individual who meets any of the following criteria will be excluded from participation in this study:

- Children with a prior diagnosis of ASD
- Families with immediate plans to leave the area if they plan not to follow through with the developmental assessment at Boston Medical Center, CHOP, or Yale due to geographic location.
- Children in foster care

## 8 Study Intervention

### 8.1 Overview.

The FN and CCM protocols will begin after a child is identified as at risk for ASD and referred for a diagnostic evaluation. FN and CCM families will have the support of their navigator/care manager for up to 100 days after completion of the diagnostic assessment – at which time, a child with ASD would be expected to be engaged in intensive early intervention services (based on the guidance from Autism Speaks). Both FN and CCM arms will have full access usual services at their primary care sites, the specialty referral clinic, and each state's ASD services network.

### 8.2 Intervention.

FN is based on patient navigation, which is a theory-based, empirically-supported, multicomponent, care management strategy.<sup>29,30</sup> It differs from other care management strategies in that it focuses on overcoming patient-specific barriers to a defined set of services over a defined, time-limited period. PN is well established in cancer care as a means to reduce disparities in the critical interval between a positive screening test (for example, a mammogram for breast cancer) and definitive diagnosis,<sup>33–35</sup> decrease anxiety,<sup>36</sup> and increase satisfaction with services.<sup>36</sup> The goal of PN is to integrate a disjointed health care system on behalf of an individual patient. FN builds upon the established principles of PN but expands the navigator role in novel ways and renames the intervention. Navigation services are provided to the family unit by bilingual paraprofessionals. It is extended to integrate a fragmented network of ASD services that requires coordination among community-based and educational services, as well as those provided by the conventional health care team. Additionally, FN is augmented with evidence-based behavior change strategies – motivational interviewing and collaborative decision making – that support patient engagement and self-management skills.

Families randomized to receive FN will meet with their navigator for 3 in-person visits: before the child's ASD evaluation to receive materials to promote family engagement and strengthen family understanding of developmental norms; after the child has been diagnosed to review recommended services and support families to access services; and 100 days after receipt of diagnosis to review the family's progress and connection to services. Additional contacts with the navigator will be based on family preference and need. Contacts between families and the navigator may be in-person at any place of the family's choosing, in addition to use of text, phone call, email, fax etc. A typical FN activity may be to assist a parent with marginal literacy to complete a clinic's patient questionnaires, help a family know what to expect during a stressful ASD diagnostic evaluation, or coordinate childcare around a child's early intervention schedule. Navigators will follow a standardized protocol, keep extensive structured logs of their work, and have a random subset of encounters between them and families audio recorded. Data will be captured on all interactions with families, providers, medical, educational, and social service organizations, recording time spent, activities performed, and barriers addressed.

### **8.3 Control Intervention.**

CCM exceeds usual care at all sites and will be provided in addition to existing procedures. CCM will be guided by manualized protocol that includes outreach to families and the child's primary care provider (PCP) and a designated direct line to reach the care manager. Outreach to families will consist of an introductory call, during which care managers will remind families about their child's developmental assessment intake appointment, offered to answer questions about the assessment and developmental services, and provided resources to community services to address social needs. Outreach to the child's PCP will include a letter to introduce the role of the care manager and provide contact information. CCM will be delivered by designated care managers, who will be existing staff at the study sites. They will have access to all resources at their site, including interpreter services. All contacts with care managers in the CCM arm, beyond the introductory phone call, must be parent-initiated.

## **9 Study Procedures**

### **9.1 Recruitment**

All children are screened using the MCHAT-R/F<sup>65</sup> at their 18 month or 2-year well-child visit as part of routine care. Children at participating sites who fail the MCHAT and/or whose provider

has high suspicion of ASD will be referred to the study coordinator, who will complete the MCHAT-R/F over the phone. Families whose children fail the MCHAT-R/F, or whose provider has high suspicion for ASD, are eligible to participate in the remaining components of the study. Families who are not interested in continued participation may opt out of the study. Those who express interest in continuing participation will meet with study staff to learn more about the study and complete informed consent

An additional recruitment strategy will be in place to reach eligible families that were not referred to the study by their child's provider. Research staff who have access to incoming referrals to the DBP clinic, will send a letter to primary care providers of children  $\geq 15$  months and  $\leq 27$  months who have failed the MCHAT-R/F and/or have been referred to the DBP clinic for a developmental evaluation for concerns related to ASD. The letter will describe the study, who is eligible, how to refer, and seek permission to contact the potentially eligible family. Research assistants will follow up with families whose provider grants permission to screen potentially interested families for eligibility as described above.

At CHOP, an additional step is being put in place for the secondary recruitment strategy per the recommendation of the CHOP IRB and the CHOP clinical staff. For children at CHOP who fail the MCHAT screen at a well-child visit but who are not referred to the CHOP DBP clinic or the study, study staff will first send a letter to the primary care provider (PCP) for permission to contact the family. If the provider grants permission, study staff will then send an opt out letter to the family. CHOP study staff will wait one week after sending the letter to begin calling the family to screen for study eligibility.

At Yale, the research staff does manual chart review to ascertain baseline and ongoing developmental screening rates. As they are reviewing charts to determine screening rates, if they identify a child who failed the MCHAT screen and provider wrote in the note that the family gave permission for the study to contact them, the coordinator will consider that a referral to the study.

## 9.2 Consent

Informed consent will occur in person in a private location selected by the participant. Study staff who have been trained in consenting procedures will obtain informed consent. They will review the consent form with the participant. They will explain the parent is consenting for his/herself and the child referred for the developmental assessment. In addition, we will use the MacArthur Competence Assessment Tool for Clinical Research (MacCAT-CR),<sup>66</sup> which our team has used in other studies to determine participants' capacity to give informed consent. The MacCAT-CR has been used widely in clinical research to assess a participant's competence to understand the nature of the study and right to express a choice regarding study participation. Potential participants will be given as much time as needed to answer questions and consider participation. Research staff will explain that the participant does not need to decide about study participation at the time of the first visit and could schedule another visit at a time of their choosing to complete the consent process. Families that do wish to participate will sign the attached consent form.

If guardianship changes during the course of the study, we will offer enrollment in the study to the new guardian. If the new guardian is interested, we will consent her/him and the assigned navigator or care manager will work with him/her for the remainder of the intervention period.

### 9.3 **Facilitated diagnostic evaluation.**

Families in the CCM group will continue to receive usual care at the DBP Clinic. At BMC, this includes receipt of a parent information packet upon referral; 3 visits to conduct the diagnostic evaluation, visit 1 to obtain child and family history; visit 2 to conduct diagnostic testing, Autism Diagnostic Observation Scale (ADOS-2);<sup>44</sup> and visit 3 to discuss results of the evaluation; and routine telephone appointment reminders prior to visits. Usual care is similar but varies slightly at CHOP and Yale. Consistent with a high-quality medical home, the care manager will be responsible to ensure that the referral for the diagnostic evaluation has been made. She is also available for family-initiated support.

Families in the FN group begin to work one-on-one with the navigator who, in contrast to the conventional care manager, provides off-site support – e.g., home visits or accompanying families to appointments. Within approximately 2 days of informed consent, the family will be contacted by the navigator by phone to arrange the first in-person meeting at a location convenient for the parent. The goal of FN during the diagnostic evaluation period is to ensure timely completion of the evaluation. The exact number and intensity of interactions with the FN is up to the family. The focus of these interactions is to understand the structure and purpose of the evaluation, gather and complete required materials, and address logistic barriers related to the diagnostic visit. Because the navigation model is individualized based on family needs, the actual number and types of visits will vary among participants. Each session should take about 30 minutes.

### 9.4 **Referral to and engagement in treatment.**

Families in the CCM group. Children who fail the M-CHAT-R/F<sup>65</sup> will be offered referral to community Birth to Three early intervention programs. The care manager will support families as needed with these referrals and will continue to provide family-initiated, clinic-based support to families for up to 100 days after the completion of diagnostic evaluation, if the family contacts the care manager.

Families in the FN group. The navigator will continue to work with the family after the diagnostic evaluation to access recommended services and support the family's engagement in treatment. Referral to specific services and community supports will be determined based on the child's diagnosis and family preferences and needs. Navigators will assist families to resolve logistical barriers and ambivalence to engagement in services. We estimate that families will have 3 face-to-face visits during the 100 days after diagnosis. These visits will be supplemented with, on average, 6 telephone and email contacts.

### 9.5 **Fidelity.**

To enhance fidelity among FN and decrease the likelihood that CCM will use motivational interviewing (MI) and collaborative problem solving in their interactions with families, we will monitor treatment fidelity by audiotaping randomly selected sessions for each FN and CCM monthly. We will review these audiotapes to assess protocol adherence using standardized checklists that allow us to check for both inclusion of unintended elements and omission of required elements. We have used such checklists in our previous studies. For FN, the checklist will assess MI fidelity by determining the presence of key MI and collaborative problem-solving processes. For CCM, we will look for the inclusion of these same components to monitor for drift/contamination.

### 9.6 **Follow-up assessment.**



Families will be asked to complete follow-up assessments 3 times during the study period. We collect data on measures of patient-centered outcomes: physical and emotional functioning; stress; caregiver burden and mastery; social support; and coping strategies. Assessments of patient-centered outcomes are timed to key intervention points - diagnostic resolution, termination of navigator services, and 12 months after the date of the failed MCHAT-R/F – in order to assess their role as mediators at these pivotal time points. Research assistants blinded to study allocation will obtain these data through verbal administration in the family’s primary language. An instrument comprising the following scales takes an average of 40 minutes to complete.

| <b>CLINICAL AND SERVICES OUTCOMES</b>  |                                                                                                                                                                                                                                                                                                                                                                                                                    |                                                                                               |                                                          |
|----------------------------------------|--------------------------------------------------------------------------------------------------------------------------------------------------------------------------------------------------------------------------------------------------------------------------------------------------------------------------------------------------------------------------------------------------------------------|-----------------------------------------------------------------------------------------------|----------------------------------------------------------|
| <b>Outcome</b>                         | <b>Measurement</b>                                                                                                                                                                                                                                                                                                                                                                                                 | <b>Data Source</b>                                                                            | <b>Timepoints assessed</b>                               |
| Expedited diagnostic evaluation        | <u>Achievement of diagnostic resolution</u> Yes/No<br>Children who complete the diagnostic assessment within the 12-month follow-up period<br><u>Diagnostic interval</u> Number of days<br>Defined as beginning the day of the positive confirmatory screen and ending the day when the family receives a determination (yes/no) of ASD diagnosis.                                                                 | Medical records                                                                               | 12 months; retrospective chart review                    |
| Referral to treatment                  | <u>Time to receipt of Birth to Three EI services</u> Number of days from failed M-CHAT<br><u>Time to receipt of ASD services/recommended services</u> Number of days from date of diagnosis                                                                                                                                                                                                                        | Early intervention records and records from other service providers that provide ASD services | 12 months; retrospective record review                   |
| Engagement in treatment                | <u>Number of hours of services</u> Hours ASD specialty services; Hours related medical services<br><u>Adequacy of services</u> Yes/No; Based on National Research Council of the National Academies of Science guideline of 25 hours/ week;<br><u>Absenteeism</u> Number of family-initiated “no show” and cancellations divided by the number of scheduled appointments in the 6-month period following diagnosis | Early intervention records and records from other service providers that provide ASD services | 12 months; retrospective record review                   |
| Determination of ASD diagnosis         | Determination of ASD diagnosis will be based on DSM V criteria made by a Board Certified DBP Pediatrician. Assessments are based on site protocols; all use standardized, validated measures appropriate for very young children. Obtained from medical record review or medical record problem list                                                                                                               | Medical records                                                                               | 12 months; retrospective chart review                    |
| Satisfaction with ASD-related services | Family satisfaction with care will be measured using the Satisfaction with Hospital Care Questionnaire <sup>61</sup> subscales on information, patient autonomy, and emotional support. been used with ethnically diverse populations.                                                                                                                                                                             | Parent report                                                                                 | Follow-up interview 100 days post-dx; 12 month follow-up |
| Satisfaction with Family Navigator     | Patient Satisfaction with Interpersonal Relationship with Navigator (PSN-I) <sup>46-48</sup> is a newly validated 9 item scale to assess satisfaction with the interpersonal relationship with the navigator. It demonstrated strong psychometric properties when validated with samples of culturally diverse, underserved cancer patients.                                                                       | Parent report                                                                                 | Follow-up interview 100 days post-dx                     |
| <b>PATIENT-CENTERED OUTCOMES</b>       |                                                                                                                                                                                                                                                                                                                                                                                                                    |                                                                                               |                                                          |

|                                                 |                                                                                                                                                                                                                                                                                                                                                                                                                                                                                                                                                                                                                                                                                                                                                                                                    |                 |                             |
|-------------------------------------------------|----------------------------------------------------------------------------------------------------------------------------------------------------------------------------------------------------------------------------------------------------------------------------------------------------------------------------------------------------------------------------------------------------------------------------------------------------------------------------------------------------------------------------------------------------------------------------------------------------------------------------------------------------------------------------------------------------------------------------------------------------------------------------------------------------|-----------------|-----------------------------|
| Caregiver stress                                | <p><u>Perceived Stress Scale- Self-Report (PSS)</u><sup>49</sup> –Stress domains include unpredictability, lack of control, burden overload, and stressful circumstances. Reliability studies have demonstrated Cronbach alphas between 0.78 and 0.86 in a variety of populations. Evidence of concurrent validity includes positive correlations with inventories of burnout, somatic symptoms, healthcare utilization, and cortisol levels.</p> <p><u>Parenting Stress Index– Short Form (PSI)</u><sup>50–52</sup>– The PSI assesses a wide range of parenting behaviors, including attachment to child, social isolation, competence, relationship with partner, and parental health. Cronbach’s <math>\alpha</math> for the parent domain is 0.93 and the test-retest coefficient is 0.96.</p> | Parent report   | Baseline and all follow-ups |
| Caregiver burden, and mastery                   | <p><u>Brief COPE</u><sup>53</sup> a valid and reliable 28-item instrument designed to measure parents’ coping strategies. Its 3 subscales include problem-focused coping, avoidant coping, and social coping. It will be administered with the <u>Pearlin Mastery Scale</u><sup>54</sup>, a widely used measure of perception of control.</p>                                                                                                                                                                                                                                                                                                                                                                                                                                                      | Parent report   | Baseline and all follow-ups |
| Parental Physical/Emotional Health              | <p><u>Veterans RAND 12 item Health Survey.</u><sup>55</sup> VR-12 includes 12 original question items from the VR-36. The questions in this survey correspond to seven different health domains: general health perceptions, physical functioning, role limitations due to physical and emotional problems, bodily pain, energy/fatigue levels, social functioning and mental health.</p>                                                                                                                                                                                                                                                                                                                                                                                                          | Parent report   | Baseline and all follow-ups |
| Social support                                  | <p><u>Medical Outcomes Survey – Social Support scale.</u><sup>56</sup> This is a brief, multidimensional, self-administered, social support survey that was developed for patients in the Medical Outcomes Study (MOS), a two-year study of patients with chronic conditions. This survey was designed to be comprehensive in terms of recent thinking about the various dimensions of social support.</p>                                                                                                                                                                                                                                                                                                                                                                                         | Parent report   | Baseline and all follow-ups |
| Child’s impact on the family                    | <p><u>Family Impact Questionnaire.</u><sup>57</sup> The FIQ measures parent’s perceptions of their child’s impact on family functioning.</p>                                                                                                                                                                                                                                                                                                                                                                                                                                                                                                                                                                                                                                                       | Parent report   | Baseline and all follow-ups |
| Parenting stress specific to symptoms of autism | <p><u>Autism Parenting Stress Index.</u><sup>58</sup> Screening and triage measure for evaluating the parenting system and identifying issues that may lead to problems in the child’s or parent’s behavior. Focuses on three major domains of stress: child characteristics, parent characteristics and situational/demographic life stress.</p>                                                                                                                                                                                                                                                                                                                                                                                                                                                  | Parent report   | Baseline and all follow-ups |
| Child’s adaptive functioning                    | <p><u>Adaptive Behavior Assessment System II.</u><sup>59</sup> The ABAS measures functional and adaptive skills overall and on subscales including communication, self-direction, and social skills.</p>                                                                                                                                                                                                                                                                                                                                                                                                                                                                                                                                                                                           | Parent report   | Baseline and 12 month       |
| <b>COMMON MEASURES REQUESTED BY NIMH</b>        |                                                                                                                                                                                                                                                                                                                                                                                                                                                                                                                                                                                                                                                                                                                                                                                                    |                 |                             |
| Family medical history                          | <p><u>Autism Centers of Excellence (ACE) Family Medical History.</u> This tool collects information on the health of all family members, including diagnoses such as autism and down syndrome.</p>                                                                                                                                                                                                                                                                                                                                                                                                                                                                                                                                                                                                 | Parent report   | Baseline                    |
| Child’s cognitive ability and motor development | <p><u>Mullen Scales of Early Learning.</u><sup>62</sup> This tool assesses developmental status in the areas of Visual Reception,</p>                                                                                                                                                                                                                                                                                                                                                                                                                                                                                                                                                                                                                                                              | RA-administered | 12 month Follow-up          |

|                           |                                                                                                                                                                                          |                        |                                                  |
|---------------------------|------------------------------------------------------------------------------------------------------------------------------------------------------------------------------------------|------------------------|--------------------------------------------------|
|                           | Fine Motor, Receptive Language, and Expressive Language scales                                                                                                                           |                        |                                                  |
| ASD diagnostic assessment | Autism Diagnostic Observation Schedule (ADOS-2) <sup>44</sup> The ADOS assesses communication and restricted and repetitive behavior to diagnose children with autism spectrum disorder. | Clinician-administered | Developmental Evaluation and 12 month follow up. |
| Child's adaptive behavior | Vineland Adaptive Behavior Scales (VABS-III) <sup>63</sup> Parent/caregiver report child functioning in the areas of social interactions, communication, and daily living skills.        | Parent report          | 12 month Follow-up                               |

At the third follow up encounter, 12 months after the date of the failed MCHAT-R/F, we will ask families to complete measures of service satisfaction and to describe their experience with the diagnostic evaluation and accessing services in their own words. This may take an additional 5-10 minutes, depending on what the family wishes to tell us. With the participant's permission, these comments will be audiotaped. We will also administer the Mullen Scales of Early Learning and the Vineland Adaptive Behavior Scales during the 12 month interview. During this visit we will also ask families to complete a second ADOS (Autism Diagnostic Observation Schedule-2)<sup>44</sup> assessment to track children's stability of symptoms over time. The first ADOS is completed as part of standard care during the child's developmental assessment at the clinic, but an additional ADOS is not part of the standard of care at any of the research sites. This second ADOS will be done about a year after the initial ADOS and may be completed at the clinic or anywhere convenient for the family. We expect the 12 month interviews to take about 3 hours to complete, and we will offer to complete them in one visit or multiple visits depending on the family's preference. If the results on the second ADOS allow families to access additional services for their child, then our study team will work with families to obtain the documentation that will entitle them to these services. Results on the second ADOS will be shared with the child's pediatrician if it shows concern for autism and the child did not receive an autism diagnosis at the time of initial evaluation by the clinic.

Estimated maximum duration for participant families is 12 months, assuming 12 months from the time of the failed MCHAT-R/F to the final outcome assessment.

Additionally, families will be asked to complete a phone call with study staff 3-4 months prior to the final interview. During this call, we will ask families some questions about the child's services. This will allow us to more closely track the child's treatment over the course of the study. The phone call will take approximately 10 minutes. For families who have already consented to the study, we will inform them of this change either at the next planned visit or by phone. The date and details of these conversations will be documented in study participants' files.

## 10 Assessment of Safety and Data Safety Monitoring Plan (DSMP)

### 10.1 Definitions

The following definitions will be used in the assessment of safety:

*Adverse Event (AE)* is any untoward or unfavorable medical occurrence in a human subject, including any abnormal sign (for example, abnormal physical exam or laboratory finding), symptom, or disease, temporally associated with the subject's participation in the research, whether or not considered related to the subject's participation in the research.

*Serious Adverse Event (SAE)* is any adverse event that

- (1) results in death;
- (2) is life-threatening;
- (3) results in inpatient hospitalization or prolongation of existing hospitalization;
- (4) results in a persistent or significant disability/incapacity;
- (5) results in a congenital anomaly/birth defect; or
- (6) based upon appropriate medical judgment, may jeopardize the subject's health and may require medical or surgical intervention to prevent one of the other outcomes listed in this definition (examples of such events include allergic bronchospasm requiring intensive treatment in the emergency room or at home, blood dyscrasias or convulsions that do not result in inpatient hospitalization, or the development of drug dependency or drug abuse).

*Life-threatening* means that the event places the subject at immediate risk of death from the event as it occurred.

*Unanticipated Problem* is defined as an event, experience or outcome that meets **all three** of the following criteria:

- is unexpected; AND
- is related or possibly related to participation in the research; AND
- suggests that the research places subjects or others at a greater risk of harm (including physical, psychological, economic, or social harm) than was previously known or recognized.

*Possibly related* means there is a reasonable possibility that the incident, experience, or outcome may have been caused by the procedures involved in the research

*Unexpected* means the nature, severity, or frequency of the event is not consistent with either:

- the known or foreseeable risk of adverse events associated with the procedures involved in the research that are described in (a) the protocol-related documents, such as the IRB-approved research protocol, any applicable investigator brochure, and the current IRB-approved informed consent document, and (b) other relevant sources of information, such as product labeling and package inserts; or
- the expected natural progression of any underlying disease, disorder, or condition of the subject(s) experiencing the adverse event and the subject's predisposing risk factor profile for the adverse event.

## 10.2 Safety Review

Both the risks listed in Section 6.1 and unknown risks will be monitored as follows:

Throughout the course of the study, all procedures and staff conduct will be monitored on an ongoing basis by each site PI (Dr. Bennett for CHOP; Dr. Weitzman for Yale; and Dr. Feinberg for BMC). Data concerning the participant accrual process, baseline characteristics of enrolled participant, degree of parental stress and diagnosis status of the children will be monitored on a weekly basis. Investigators will meet weekly with intervention providers and research assistants to discuss all active study participants.

Monitoring will pay particular attention to adverse events or events that have the potential to become adverse. Adverse events for this study will include mandatory reports to child protective services for suspected abuse or neglect, new (i.e. previously unknown) domestic violence situations, complaints from study participants, or any instance of breach of privacy or confidentiality. Reporting of adverse events and unanticipated problems to the IRB at each site will be done by the study team for that site and occur in compliance with the IRB reporting policies for that institution. Additionally, any unanticipated problems and adverse events will be reported to the study's Data Safety Monitoring Board (DSMB), which will meet every six months during the project period.

Dr. Cabral (statistician) will join the site PI monthly telephone calls quarterly to review data for the overall project. In case of an unanticipated problem or adverse event, site PIs will notify Dr. Feinberg concurrent with notifying his/her home institution's IRB. If central monitoring uncovers an unanticipated problem based on review of the aggregate data, then Dr. Feinberg will alert the site PIs of the issue, as well as the Boston University Medical Center IRB.

### Reporting Plans

The Principal Investigator at BMC/BU Medical Campus will report Unanticipated Problems, safety monitors' reports, and Adverse Events to the BU Medical Center IRB in accordance with IRB policies:

- Unanticipated Problems occurring at BMC/BU Medical Campus involving a fatal or life-threatening event will be reported to the IRB within 2 days of the investigator learning of the event.
- Unanticipated Problems occurring at BMC/BU Medical Campus not involving a fatal or life-threatening event will be reported to the IRB within 7 days of the investigator learning of the event.
- Reports from safety monitors with recommended changes will be reported to the IRB within 7 days of the investigator receiving the report.
- Adverse Events (including Serious Adverse Events) will be reported in summary at the time of continuing review, along with a statement that the pattern of adverse events, in total, does not suggest that the research places subjects or others at a greater risk of harm than was previously known.
- Reports from safety monitors with no recommended changes will be reported to the IRB at the time of continuing review.

### 10.3 Stopping Rules

The study has no stopping rules.

## 11 Data Handling and Record Keeping

### 11.1 Confidentiality

- Participants' names will not be put on their respective research surveys or data collections forms. Rather, participants will be assigned a code number (subject ID). The list that links this code number and the name will be kept in a separate, locked location.

Only study personnel will have access to this information. Additional steps will be taken to protect the privacy of all participants. These include separating all research interviews with the assigned code number from all referral documents including the participant's name and contact information, which will also be kept in a locked location.

- Audiotapes that are obtained as part of the research will be identified by subject ID and stored in a password protected location on a HIPAA-compliant web storage system to which only the study PI and key study staff have access to. They will be destroyed after 3 years. Transcribed audiotapes will be stripped of all identifiers and stored on a password protected computer in a password protected file.
- All family navigator sessions will take place in a private area where the parent feels comfortable. If family navigator personnel accompany a parent to an appointment, verbal permission to attend will be received from the parents by the family navigator before this type of session.
- All research interviews, including baseline and follow up measures will be completed in a private office or setting

Access to individually identified private information. Only the PI and research staff that have been trained on HIPPA regulations and human subjects protection will have access to individually identifiable information about human subjects. This information will only be available after participants have consented to study participation or have specifically awarded permission to this information

## 11.2 Source Documents

Material to be collected. For this study, we will make no use of biological specimens. We will gather the following types of data:

- Individual participant data will be collected directly and voluntarily from the participants themselves in the form of confidential paper data collection instruments and face-to-face interviews. These data will be collected from participants in qualitative interviews and from families who provide informed consent.
- Diagnostic and service data will be abstracted from the medical, early intervention, and ASD service provider records of children whose families have provided consent.

## 11.3 Study Records Retention

All subjects will be assigned a subject ID. This study code will be marked on each study document, or survey associated with the subject. A cross-walk that links study codes to subject's names will be kept in a password protected file on a password protected computer at each site in a locked office. Each site will only have access to identifying information for subjects from their site, except for the central research team in Boston who will manage data quality across all sites. This cross-walk will be kept throughout the duration of the study, and then destroyed once data analysis is complete.

All hard copies of the data will be kept in a locked file cabinet in a locked office. Data will be kept for 3 years after study completion as required. After the period all paper records will be destroyed by shredding.

All data entered for analysis will be entered into a password protected database (StudyTRAX) and kept in a locked office. Database files contain different levels of permission to ensure several layers of protection. The database application, called StudyTRAX, uses MS SQL Server as the back end relational database. The program can support one or more research studies, is presently being used at dozens of major academic research centers to support numerous NIH funded projects and is available commercially. The HIPAA privacy rules and HIPAA security rules mandate that covered entities have in place appropriate policies and procedures to protect the confidentiality and security of protected health information. In compliance with these regulations, the database security features of StudyTRAX target multiple levels including the data element (e.g., restricted access to fields), user (e.g., password authentication access), application (e.g., role-based access to features, access audit trails), and hosting services (e.g., firewall, secure sockets layer). Taken together, these features ensure access control, audit control, data integrity, user authentication, and transmission security. The research project(s) will be set up in StudyTRAX to ensure exported datasets are de-identified as defined in the HIPAA privacy regulation [45 C.F.R. §164.514 (b)(2)].

Data security is assured by the following: (1) All server requests are transmitted over SSL using 256-bit encryption, (2) a dedicated Cisco router firewall only allows requests to StudyTRAX, (3) the database is stored on a separate server in a private independent subnet with no public IP address, (4) database and log files are encrypted, and (5) database and log backups are encrypted.

Data is protected from loss by the following: (1) A redundant array of independent disk [RAID] Level 5 is used to ensure that data will not be lost if a hard drive fails, (2) full database backups are done nightly, (3) database log file backups are done every 15 minutes, (3) database integrity checks and index maintenance are performed nightly, (4) the database and log backup files are retained as part of Rackspace's backup process and also transferred every hour to Microsoft's Azure geographically redundant storage.

## 12 Statistical Plan

### 12.1 Study Hypotheses

#### 12.1.1 Primary Hypothesis.

- We hypothesize that relative to CCM, children whose families receive FN will achieve diagnostic ascertainment and engagement in recommended developmental service in fewer days than children whose families are assigned to CCM.

#### 12.1.2 Secondary Hypotheses

- We hypothesize that FN will have a differential effect at the three study sites
- We hypothesize that race and ethnicity will moderate the effect of FN
- We hypothesize that parents who receive FN will experience lower caregiver stress, burden, and family impact than parents who receive CCM

## 12.2 Sample Size Determination

We plan to enroll and randomize approximately 250 children who are our primary recruitment sample per clinicaltrials.gov. Additional NIMH funding for a supplement (R01MH104355-04S1) awarded September 16, 2017, supports the recruitment of an additional 100 children that will allow the subgroup analyses as outlined below. According to Kraemer's threshold of clinical significance<sup>38</sup> concept, we estimate the required sample size to detect the smallest differences in primary outcomes that are of clinical importance. In the ITT analysis, we assess the adequacy of the expected sample to detect main effects among all children randomized (125 per treatment arm), assuming a two-sided alpha of 0.05. The augmented sample size (350) gives us sufficient power to conduct subgroup analyses to detect differences in key outcomes by race and gender. Specifically, this is a sufficient sample to detect a 20% difference in diagnostic completion rates by gender. Similarly, the sample size allows the detection of moderate effect sizes for patient-centered continuous outcomes, such as social support. We present power calculations for planned categorical analyses. Power to detect between group differences in analyses of count data will exceed those presented below.

*Completion of diagnostic evaluation.* We consider a 25% absolute difference in diagnostic ascertainment rates between treatment arms to be clinically meaningful and to provide evidence of the effectiveness of FN compared to CCM. Based on pilot studies (now published),<sup>67,68</sup> assuming that 65% in the CCM arm would achieve diagnostic ascertainment and a moderate design effect resulting from site clustering (intraclass correlation of 0.01), a sample size of 250 was estimated to detect 25% difference in diagnostic ascertainment with 80% power at a two-sided alpha of 0.05.

*Time to receipt of recommended services.* We assume that 80% in FN arm and 60% in the CCM arm will receive ASD services 5 months after a failed M-CHAT screen. A log rank test will have over 80% power to detect such differences as clinically significant at the 0.05 level.

## 12.3 Statistical Methods

### 12.3.1 Logistics.

We will record the numbers of families eligible and refusing participation. We will assess reasons for refusal at each stage of the protocol and record participant attrition. We will note all adverse events.

### 12.3.2 Intervention main effects.

Under the direction of Dr. Cabral, we will conduct an intention-to-treat (ITT) analysis.<sup>69</sup> In the intention-to-treat analyses, the denominator will include all children randomized to a treatment arm.

- For categorical outcomes – we will use logistic regression models to compare the proportion of children who were referred for diagnostic evaluation, completed the diagnostic evaluation, and received recommended ASD specific services.
- For time-to-event outcomes –time to diagnostic resolution, and time to receipt of ASD services - we will use censored analyses to construct Kaplan-Meier curves of time to event, and estimate hazard ratios, using Cox proportional hazard models.

## 12.4 Mediator/ Moderator Analyses



*Moderation analyses* Using Rothman's methodology,<sup>70</sup> we have identified two a priori, theory-based potential effect modifiers: site and child race/ethnicity. To assess effect modification by site we will include group x site interaction terms in our statistical models; to assess for effect modification by race/ethnicity we will include a group x ethnicity interaction term in these models. If the interaction is significant, we will perform stratified analyses to identify the nature of such moderation.

*Center effects.* One of the strengths of our study is that each clinic site (center) is unique – in terms of its own clinical processes and the early intervention sites it has access to. We will pay close attention to center effects. By randomizing our sample separately within each center, we eliminate the potential of confounding by center. However, we will also examine potential clustering and assess effect modification by center,<sup>71</sup> which will help us determine the generalizability of the FN model.

*Racial and ethnic group effects.* Specific barriers to ASD identification and service provision differ by race and ethnicity.<sup>22,25–28</sup> A strength of our sample is that we can examine the impact of the intervention for key population subgroups that have been under-screened, -assessed, and -treated for ASD.

*Examination of intervention mechanism.* Given our intervention's emphasis on goal setting and action planning, decreased caregiver burden, decreased perceptions of stress, and behavioral activation constitute likely intervention mediators. We will examine mediational effects using two different, but related, methods: the approach of Baron and Kenny<sup>72</sup> and the use of path analysis models. Each of these approaches can be used to differentiate between direct and indirect intervention effects. In the path analysis models, we will compare the fit of mediational vs. non-mediational models by differences in Akaike's Information Criterion, the comparative fit index (optimal value > 0.95), the Tucker-Lewis index (optimal value > 0.95), and the root mean square error of approximation (optimal values < 0.06). We will fit these models with MPlus software, which allows for the modeling of measurement and dichotomous, endogenous and exogenous variables.

## 12.5 Sub-group Analyses

Per [clinicaltrials.gov](http://clinicaltrials.gov), data from 250 enrolled participants will be utilized to measure primary outcomes as outlined above. An additional sample of approximately 100 participants will facilitate subgroup analyses by gender, race, and ethnicity. The sample size of approximately 350 participants provides sufficient power to detect key differences in outcomes by gender and race/ethnicity. Proposed sub-group analyses are as follows:

- *Relative to ASD screening:* We will examine differences in our baseline data stratified by gender, race, and ethnicity to understand differences among children identified with ASD risk through routine screening in primary care. Key variables of interest are age at positive screen, MCHAT-R/F score, adaptive functioning, and measures family functioning and parental stress.
- *Relative to diagnostic ascertainment and engagement in service.* We will examine gender and racial/ethnic differences between the proportion of children who complete the diagnostic evaluation using logistic regression models. We will also assess differences in time to diagnostic resolution, and time to receipt of ASD services using censored analyses to construct Kaplan-Meier curves of time to event, and estimating hazard ratios from Cox proportional hazard models. Among children who receive an ASD diagnosis we can examine gender and racial/ethnic differences in engagement in

services through analysis of early intervention and autism specialty service records that detail recommended hours of service and hours of service received.

- *Relative to trajectories of family functioning over time.* We will compare the effect of gender and race/ethnicity on measures of family/parental functioning (parenting stress, social support, mental health) among young children diagnosed with ASD. We will use multivariate models for longitudinal data (here, for measures taken at baseline, and three additional time points during the follow-up period) that account for the correlated nature of the data. Specifically, we will employ linear regression models fitted via generalized estimating equations (GEE) or mixed models. These models permit the inclusion time-dependent variables, which allow us to examine, for example, the effect of child's adaptive functioning on parent trajectories. In these models, we will adjust for any differences in baseline characteristics between gender groups. We will assess for effect modification by gender by assessing the significance of the group by time by gender interaction.

### 13 Ethics/Protection of Human Subjects

This study is to be conducted according to applicable US federal regulations and institutional policies (which are based in federal regulations, guidance, and ICH Good Clinical Practice guidelines).

This protocol and any amendments will be submitted to the Boston Medical Center and Boston University Medical Campus IRB, for formal approval of the study conduct. The decision of the IRB concerning the conduct of the study will be made in writing to the investigator. A copy of the initial IRB approval letter will be provided to the sponsor before commencement of this study.

All subjects for this study will be provided a consent form describing this study and providing sufficient information for subjects to make an informed decision about their participation in this study. The consent form will be submitted with the protocol for review and approval by the IRB. The consent of a subject, using the IRB-approved consent form, must be obtained before that subject is submitted to any study procedure. Consent will be documented as required by the IRB.

## References

1. Robins DL, Dumont-Mathieu TM. Early screening for autism spectrum disorders: Update on the modified checklist for autism in toddlers and other measures. *J Dev Behav Pediatr*. 2006. doi:10.1097/00004703-200604002-00009
2. Kleinman JM, Robins DL, Ventola PE, et al. The modified checklist for autism in toddlers: A follow-up study investigating the early detection of autism spectrum disorders. *J Autism Dev Disord*. 2008. doi:10.1007/s10803-007-0450-9
3. Robins DL. Screening for autism spectrum disorders in primary care settings. *Autism*. 2008. doi:10.1177/1362361308094502
4. Chlebowski C, Robins DL, Barton ML, Fein D. Large-scale use of the modified checklist for autism in low-risk toddlers. *Pediatrics*. 2013. doi:10.1542/peds.2012-1525
5. Robins DL, Fein D, Barton ML, Green JA. The Modified Checklist for Autism in Toddlers: An Initial Study Investigating the Early Detection of Autism and Pervasive Developmental Disorders. *J Autism Dev Disord*. 2001. doi:10.1023/A:1010738829569
6. Pandey J, Verbalis A, Robins DL, et al. Screening for autism in older and younger toddlers with the Modified Checklist for Autism in Toddlers. *Autism*. 2008. doi:10.1177/1362361308094503
7. Filipek PA, Accardo PJ, Ashwal S, et al. Practice parameter: Screening and diagnosis of autism. Report of the quality standards subcommittee of the American Academy of Neurology and the Child Neurology Society. *Neurology*. 2000. doi:10.1212/WNL.55.4.468
8. Johnson CP, Myers SM, Lipkin PH, et al. Identification and evaluation of children with autism spectrum disorders. *Pediatrics*. 2007. doi:10.1542/peds.2007-2361
9. Dawson G, Jones E, Merkle K, et al. Early behavioral intervention is associated with normalized brain activity in young children with autism. *J Am Acad Child Adolesc Psychiatry*. 2012. doi:10.1016/j.jaac.2012.08.018
10. Dawson G, Rogers S, Munson J, et al. Randomized, controlled trial of an intervention for toddlers with autism: The early start Denver model. *Pediatrics*. 2010. doi:10.1542/peds.2009-0958
11. Kasari C, Gulsrud AC, Wong C, Kwon S, Locke J. Randomized controlled caregiver mediated joint engagement intervention for toddlers with autism. *J Autism Dev Disord*. 2010. doi:10.1007/s10803-010-0955-5
12. Kasari C, Gulsrud A, Freeman S, Paparella T, Helleman G. Longitudinal follow-up of children with autism receiving targeted interventions on joint attention and play. *J Am Acad Child Adolesc Psychiatry*. 2012. doi:10.1016/j.jaac.2012.02.019
13. Kalb LG, Freedman B, Foster C, et al. Determinants of appointment absenteeism at an outpatient pediatric autism clinic. *J Dev Behav Pediatr*. 2012. doi:10.1097/DBP.0b013e31826c66ef
14. Radecki L, Sand-Loud N, O'Connor KG, Sharp S, Olson LM. Trends in the use of standardized tools for developmental screening in early childhood: 2002-2009. *Pediatrics*. 2011. doi:10.1542/peds.2010-2180
15. Zuckerman KE, Mattox K, Donelan K, Batbayar O, Baghaee A, Bethell C. Pediatrician identification of Latino children at risk for autism spectrum disorder. *Pediatrics*. 2013. doi:10.1542/peds.2013-0383
16. Fountain C, King MD, Bearman PS. Age of diagnosis for autism: Individual and community factors across 10 birth cohorts. *J Epidemiol Community Health*. 2011. doi:10.1136/jech.2009.104588
17. Mandell DS, Novak MM, Zubritsky CD. Factors associated with age of diagnosis among children with autism spectrum disorders. *Pediatrics*. 2005. doi:10.1542/peds.2005-0185
18. Manning SE, Davin CA, Barfield WD, et al. Early diagnoses of autism spectrum disorders

- in Massachusetts birth cohorts, 2001-2005. *Pediatrics*. 2011. doi:10.1542/peds.2010-2943
19. Parner ET, Schendel DE, Thorsen P. Autism prevalence trends over time in Denmark: Changes in prevalence and age at diagnosis. *Arch Pediatr Adolesc Med*. 2008. doi:10.1001/archpedi.162.12.1150
  20. Shattuck PT, Durkin M, Maenner M, et al. Timing of identification among children with an autism spectrum disorder: Findings from a population-based surveillance study. *J Am Acad Child Adolesc Psychiatry*. 2009. doi:10.1097/CHI.0b013e31819b3848
  21. Summaries S. Morbidity and Mortality Weekly Report Prevalence of Autism Spectrum Disorders — Autism and Developmental Disabilities Monitoring Network , United States , 2006. *Morb Mortal Wkly report Surveill Summ (Washington, DC 2009)*. 2009.
  22. Mandell DS, Listerud J, Levy SE, Pinto-Martin JA. Race differences in the age at diagnosis among medicaid-eligible children with autism. *J Am Acad Child Adolesc Psychiatry*. 2002. doi:10.1097/00004583-200212000-00016
  23. Thomas KC, Ellis AR, McLaurin C, Daniels J, Morrissey JP. Access to care for autism-related services. *J Autism Dev Disord*. 2007. doi:10.1007/s10803-006-0323-7
  24. Liptak GS, Benzoni LB, Mruzek DW, et al. Disparities in diagnosis and access to health services for children with autism: Data from the national survey of children's health. *J Dev Behav Pediatr*. 2008. doi:10.1097/DBP.0b013e318165c7a0
  25. Mandell DS, Morales KH, Xie M, Lawer LJ, Stahmer AC, Marcus SC. Age of diagnosis among medicaid-enrolled children with autism, 2001-2004. *Psychiatr Serv*. 2010. doi:10.1176/ps.2010.61.8.822
  26. Magaña S, Parish SL, Rose RA, Timberlake M, Swaine JG. Racial and ethnic disparities in quality of health care among children with autism and other developmental disabilities. *Intellect Dev Disabil*. 2012. doi:10.1352/1934-9556-50.4.287
  27. Magaña S, Lopez K, Aguinaga A, Morton H. Access to diagnosis and treatment services among latino children with autism spectrum disorders. *Intellect Dev Disabil*. 2013. doi:10.1352/1934-9556-51.3.141
  28. Broder-Fingert S, Shui A, Pulcini CD, Kurowski D, Perrin JM. Racial and ethnic differences in subspecialty service use by children with autism. *Pediatrics*. 2013. doi:10.1542/peds.2012-3886
  29. Freeman HP, Rodriguez RL. History and principles of patient navigation. *Cancer*. 2011. doi:10.1002/cncr.26262
  30. Dohan D, Schrag D. Using navigators to improve care of underserved patients: Current practices and approaches. *Cancer*. 2005. doi:10.1002/cncr.21214
  31. Natale-Pereira A, Enard KR, Nevarez L, Jones LA. The role of patient navigators in eliminating health disparities. *Cancer*. 2011. doi:10.1002/cncr.26264
  32. Freund KM, Battaglia TA, Calhoun E, et al. National Cancer Institute Patient Navigation Research Program: Methods, protocol, and measures. *Cancer*. 2008. doi:10.1002/cncr.23960
  33. Battaglia TA, Roloff K, Posner MA, Freund KM. Improving follow-up to abnormal breast cancer screening in an urban population: A patient navigation intervention. In: *Cancer*. ; 2007. doi:10.1002/cncr.22354
  34. Ell K, Vourlekis B, Lee PJ, Xie B. Patient navigation and case management following an abnormal mammogram: A randomized clinical trial. *Prev Med (Baltim)*. 2007. doi:10.1016/j.ypmed.2006.08.001
  35. Phillips CE, Rothstein JD, Beaver K, Sherman BJ, Freund KM, Battaglia TA. Patient navigation to increase mammography screening among inner city women. *J Gen Intern Med*. 2011. doi:10.1007/s11606-010-1527-2
  36. Ferrante JM, Chen PH, Kim S. The effect of patient navigation on time to diagnosis,

- anxiety, and satisfaction in urban minority women with abnormal mammograms: A randomized controlled trial. *J Urban Heal*. 2008. doi:10.1007/s11524-007-9228-9
37. Autism Speaks. First 100 Days Kit. 2008.
  38. Kraemer HC, Mintz J, Noda A, Tinklenberg J, Yesavage JA. Caution regarding the use of pilot studies to guide power calculations for study proposals. *Arch Gen Psychiatry*. 2006. doi:10.1001/archpsyc.63.5.484
  39. Lancaster GA, Dodd S, Williamson PR. Design and analysis of pilot studies: Recommendations for good practice. *J Eval Clin Pract*. 2004. doi:10.1111/j..2002.384.doc.x
  40. Westfall JM, Mold J, Fagnan L. Practice-based research - "Blue highways" on the NIH roadmap. *J Am Med Assoc*. 2007. doi:10.1001/jama.297.4.403
  41. Feinberg E, Silverstein M, Donahue S, Bliss R. The impact of race on participation in part C early intervention services. *J Dev Behav Pediatr*. 2011. doi:10.1097/DBP.0b013e3182142fbd
  42. Schopler E, Reichler RJ, DeVellis RF, Daly K. Toward objective classification of childhood autism: Childhood Autism Rating Scale (CARS). *J Autism Dev Disord*. 1980. doi:10.1007/BF02408436
  43. Stone WL, Coonrod EE, Turner LM, Pozdol SL. Psychometric properties of the STAT for early autism screening. *J Autism Dev Disord*. 2004. doi:10.1007/s10803-004-5289-8
  44. Lord, C., Rutter, M., DiLavore, P., Risi, S., Gotham, K., & Bishop S. Autism Diagnostic Observation Schedule, Second Edition. *Torrance, CA West Psychol Serv*. 2012.
  45. Wetherby AM, Brosnan-Maddox S, Peace V, Newton L. Validation of the Infant-Toddler Checklist as a broadband screener for autism spectrum disorders from 9 to 24 months of age. *Autism*. 2008. doi:10.1177/1362361308094501
  46. Jean-Pierre P, Fiscella K, Winters PC, Paskett E, Wells K, Battaglia T. Cross-cultural validation of a Patient Satisfaction with Interpersonal Relationship with Navigator measure: A multi-site patient navigation research study. *Psychooncology*. 2012. doi:10.1002/pon.2018
  47. Jean-Pierre P, Fiscella K, Winters PC, et al. Psychometric validation and reliability analysis of a Spanish version of the patient satisfaction with cancer-related care measure: A patient navigation research program study. *Support Care Cancer*. 2012. doi:10.1007/s00520-011-1297-3
  48. Jean-Pierre P, Fiscella K, Winters PC, et al. Psychometric development and reliability analysis of a patient satisfaction with interpersonal relationship with navigator measure: A multi-site patient navigation research program study. *Psychooncology*. 2012. doi:10.1002/pon.2002
  49. Cohen S, Kamarck T, Mermelstein R. A global measure of perceived stress. *J Health Soc Behav*. 1983. doi:10.2307/2136404
  50. Abidin RR. Parenting Stress Index: A measure of the parent-child system. In: *Evaluating Stress: A Book of Resources*. ; 1997.
  51. Secco ML, Moffatt MEK. Situational, maternal, and infant influences on parenting stress among adolescent mothers. *Compr Child Adolesc Nurs*. 2003. doi:10.1080/01460860390197862
  52. Stewart-Brown S, Patterson J, Mockford C, Barlow J, Klimes I, Pyper C. Impact of a general practice based group parenting programme: Quantitative and qualitative results from a controlled trial at 12 months. *Arch Dis Child*. 2004. doi:10.1136/adc.2003.028365
  53. Carver CS. You want to measure coping but your protocol's too long: Consider the brief COPE. *Int J Behav Med*. 1997. doi:10.1207/s15327558ijbm0401\_6
  54. Pearlin LI, Schooler C. The structure of coping. *J Health Soc Behav*. 1978. doi:10.2307/2136319

55. Selim AJ, Rogers W, Fleishman JA, et al. Updated U.S. population standard for the Veterans RAND 12-item Health Survey (VR-12). *Qual Life Res.* 2009. doi:10.1007/s11136-008-9418-2
56. Sherbourne CD, Stewart AL. The MOS social support survey. *Soc Sci Med.* 1991. doi:10.1016/0277-9536(91)90150-B
57. Donenberg G, Baker BL. The impact of young children with externalizing behaviors on their families. *J Abnorm Child Psychol.* 1993. doi:10.1007/BF00911315
58. Silva LMT, Schalock M. Autism parenting stress index: Initial psychometric evidence. *J Autism Dev Disord.* 2012. doi:10.1007/s10803-011-1274-1
59. Harrison P, Oakland T. *Adaptive Behavior Assessment System II.* San Antonio, TX: The Psychological Corporation; 2000.
60. Broadbent E, Petrie KJ, Main J, Weinman J. The Brief Illness Perception Questionnaire. *J Psychosom Res.* 2006. doi:10.1016/j.jpsychores.2005.10.020
61. Hendriks AAJ, Oort FJ, Vrieling MR, Smets EMA. Reliability and validity of the satisfaction with hospital care questionnaire. *Int J Qual Heal Care.* 2002. doi:10.1093/intqhc/14.6.471
62. Mullen EM. Mullen Scales of Early Learning, AGS Edition: Manual and Item Administrative Books. *Am Guid Serv Inc.* 1995.
63. Sparrow S, Cicchetti D V., Saulnier CA. *Vineland Adaptive Behavior Scales Third Edition.* Pearson Assessments; 2016.
64. Landon BE, Gill JM, Antonelli RC, Rich EC. Prospects for rebuilding primary care using the patient-centered medical home. *Health Aff.* 2010. doi:10.1377/hlthaff.2010.0016
65. Robins DL, Fein D, Barton M. Modified Checklist for Autism in Toddlers , Revised with Follow-Up. [Http://www Mchatscreen Com.](http://www.Mchatscreen.Com) 2009.
66. Appelbaum PS, Grisso T. *MacArthur Competence Assessment Tool for Clinical Research (MacCAT-CR).* Sarasota, FL: Professional Resource; 2001.
67. Feinberg E, Kuhn J, Eilenberg JS, et al. Improving Family Navigation for Children With Autism: A Comparison of Two Pilot Randomized Controlled Trials. *Acad Pediatr.* 2020. doi:10.1016/j.acap.2020.04.007
68. Feinberg E, Abufhele M, Sandler J, et al. Reducing disparities in timely autism diagnosis through family navigation: Results from a randomized pilot trial. In: *Psychiatric Services.* ; 2016. doi:10.1176/appi.ps.201500162
69. Fergusson D, Aaron SD, Guyatt G, Hébert P. Post-randomisation exclusions: The intention to treat principle and excluding patients from analysis. *Br Med J.* 2002. doi:10.1136/bmj.325.7365.652
70. Rothman K, Greenland S. *Modern Epidemiology.* 2nd ed. Philadelphia: Lippincott, Williams, and Wilkins; 1998.
71. Localio AR, Berlin JA, Ten Have TR, Kimmel SE. Adjustments for center in multicenter studies: An overview. *Ann Intern Med.* 2001. doi:10.7326/0003-4819-135-2-200107170-00012
72. Baron RM, Kenny DA. The moderator-mediator variable distinction in social psychological research: Conceptual, strategic, and statistical considerations. *J Pers Soc Psychol.* 1986. doi:10.1037//0022-3514.51.6.1173
