# Supplementary material
Source: PubMed Central journal article supplement (PMC7802008)
Supplement: jamapediatr-e205218-s002.pdf [file jamapediatr-e205218-s002.pdf]

# Data Sharing Statement

Feinberg. Effect of Family Navigation on Diagnostic Ascertainment Among Children at Risk for Autism. *JAMA Pediatr.* Published January 11, 2021. doi:10.1001/jamapediatrics.2020.5218

## Data

**Data available:** Yes

**Data types:** Deidentified participant data, Data dictionary

**How to access data:** National Database Autism for Autism Research

**When available:** beginning date: 07-01-2021

## Supporting Documents

**Document types:** None

## Additional Information

**Who can access the data:** We will follow NDAR guidance for data access.

**Types of analyses:** We will follow NDAR's guidance for data access

**Mechanisms of data availability:** We will follow NDAR's guidance for data access
